# Supplementary figures and images for: Open Porosity and Pore Size Distribution of Mesoporous Silica Films Investigated by Positron Annihilation Lifetime Spectroscopy and Ellipsometric Porosimetry
Source: MDPI journal article supplement (doi:10.3390/ma14123371), 2021-06-18

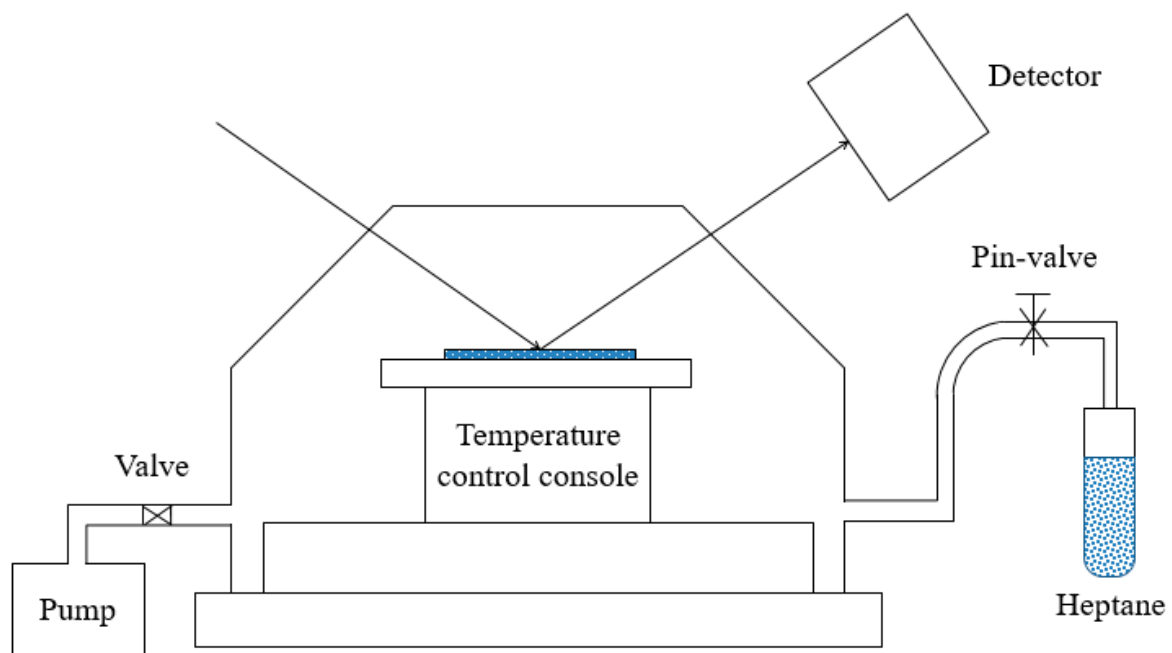

**Figure S1.** The schematic diagram of the apparatus of heptane adsorption.

Supplement: s1 [file s1]
